# Ligand Binding Study of Human PEBP1/RKIP: Interaction with Nucleotides and Raf-1 Peptides Evidenced by NMR and Mass Spectrometry

Laurette Tavel<sup>1</sup>, Lucie Jaquillard<sup>2</sup>, Andreas I. Karsisiotis<sup>2</sup>, Fabienne Saab<sup>2,3</sup>, Laurence Jouvensal<sup>2</sup>, Alain Brans<sup>4</sup>, Agnès F. Delmas<sup>2</sup>, Françoise Schoentgen<sup>5</sup>, Martine Cadene<sup>2</sup>, Christian Damblon<sup>1\*</sup>

**1** Department of Chemistry, University of Liège, Liège, Belgium, **2** CBM, CNRS, Orléans, France, **3** Institut de Chimie Organique et Analytique (ICOA), University of Orléans, CNRS FR 2708, UMR 7311, Orléans, France, **4** CIP, University of Liège, Liège, Belgium, **5** IMPMC, University Pierre & Marie Curie (P6), Paris, France

## Abstract

**Background:** Human Phosphatidylethanolamine binding protein 1 (hPEBP1) also known as Raf kinase inhibitory protein (RKIP), affects various cellular processes, and is implicated in metastasis formation and Alzheimer's disease. Human PEBP1 has also been shown to inhibit the Raf/MEK/ERK pathway. Numerous reports concern various mammalian PEBP1 binding ligands. However, since PEBP1 proteins from many different species were investigated, drawing general conclusions regarding human PEBP1 binding properties is rather difficult. Moreover, the binding site of Raf-1 on hPEBP1 is still unknown.

**Methods/Findings:** In the present study, we investigated human PEBP1 by NMR to determine the binding site of four different ligands: GTP, FMN, and one Raf-1 peptide in tri-phosphorylated and non-phosphorylated forms. The study was carried out by NMR in near physiological conditions, allowing for the identification of the binding site and the determination of the affinity constants  $K_D$  for different ligands. Native mass spectrometry was used as an alternative method for measuring  $K_D$  values.

**Conclusions/Significance:** Our study demonstrates and/or confirms the binding of hPEBP1 to the four studied ligands. All of them bind to the same region centered on the conserved ligand-binding pocket of hPEBP1. Although the affinities for GTP and FMN decrease as pH, salt concentration and temperature increase from pH 6.5/NaCl 0 mM/20°C to pH 7.5/NaCl 100 mM/30°C, both ligands clearly do bind under conditions similar to what is found in cells regarding pH, salt concentration and temperature. In addition, our work confirms that residues in the vicinity of the pocket rather than those within the pocket seem to be required for interaction with Raf-1.

**Citation:** Tavel L, Jaquillard L, Karsisiotis AI, Saab F, Jouvensal L, et al. (2012) Ligand Binding Study of Human PEBP1/RKIP: Interaction with Nucleotides and Raf-1 Peptides Evidenced by NMR and Mass Spectrometry. PLoS ONE 7(4): e36187. doi:10.1371/journal.pone.0036187

**Editor:** Beata G. Vertessy, Institute of Enzymology of the Hungarian Academy of Science, Hungary

**Received:** October 26, 2011; **Accepted:** April 2, 2012; **Published:** April 27, 2012

**Copyright:** © 2012 Tavel et al. This is an open-access article distributed under the terms of the Creative Commons Attribution License, which permits unrestricted use, distribution, and reproduction in any medium, provided the original author and source are credited.

**Funding:** This research was supported by ANR (Agence Nationale pour la Recherche; <http://www.agencenationale-recherche.fr/>) grant ANR-08-BLAN-0033 including a post-doctoral fellowship to LT, "La Ligue contre le cancer" (<http://www.ligue-cancer.net/>), "Cancéropôle Grand Ouest" (AO2007-2010; <http://www.canceropole-grandouest.com>), CNRS (Centre National de la Recherche Scientifique; <http://www.cnrs.fr/>), "Régions Bretagne, Centre, Pays de la Loire et Poitou-Charentes (AO2007-2010; <http://www.bretagne.fr/>; <http://www.regioncentre.fr/>; <http://www.paysdelaloire.fr/>; <http://www.poitou-charentes.fr/>), "Patrimoine de l'ULg" (<http://www.ulg.ac.be>) and the EU-NMR program (RII3-026145). The funders had no role in study design, data collection and analysis, decision to publish, or preparation of the manuscript.

**Competing Interests:** The authors have declared that no competing interests exist.

\* E-mail: c.damblon@ulg.ac.be

## Introduction

Phosphatidylethanolamine binding protein 1 (PEBP1), also known as Raf kinase inhibitory protein (RKIP), is involved in several processes in living cells. Its physiological function, mechanism of action and binding properties have been studied by using various cells and tissues from human, bovine, rat and mouse. The main results have revealed that PEBP1/RKIP regulates three key mammalian signaling pathways, namely Raf/MEK/ERK, NF- $\kappa$ B and G-protein coupled receptors (GPCR), and is implicated in signaling [1–3], proliferation [4], differentiation [5], migration [6], survival [7], and cell apoptosis [8,9]. PEBP1 acts by direct interaction with the protein kinases involved in the pathways, such as Raf-1 [1,10], MEK and ERK [11]. The interaction of PEBP1 with these protein kinases leads to their inhibition. As an example,

the phosphorylation of Raf-1 by p21-activated kinase (PAK) and by Src family kinases, which is required for Raf-1 activity, is prevented by PEBP1 binding [12]. Bound Raf-1 is then inactive as a MEK kinase, which deregulates the ERK pathway. Upon phosphorylation by PKC on Ser153, PEBP1 dissociates from Raf-1 and inhibits the G-protein-coupled receptor kinase 2 (GRK2), which is a negative regulator of GPCRs [13,14]. PEBP1 has also been shown to bind NF- $\kappa$ B inducing the kinase NIK and to inhibit the signaling mediated by NF- $\kappa$ B which plays a prominent role in apoptosis [2].

More specifically in human, hPEBP1 has been identified as a metastasis suppressor [15] since hPEBP1 expression is decreased in metastatic prostate [16,17] and breast [18,19] cancers. Moreover, hPEBP1 is a cell sensitizer to chemotherapy and immunotherapy [20]. Finally, hPEBP1 may also be involved in Alzheimer's disease [21], infertility [22,23], and diabetes [24].

hPEBP1 is a member of the phosphatidylethanolamine binding protein (PEBP) family, which is a highly conserved group of more than 400 ubiquitous proteins found in a variety of tissues from a wide range of organisms (bacteria, yeasts, insects, mammals and plants). The crystal structures of PEBPs have revealed a remarkably conserved ligand-binding pocket. X-ray studies for bovine and human PEBPs showed that ions such as acetate and *o*-phosphorylethanolamine (PE) (PDB 1A44; PDB 1B7A) [25], phosphate and *o*-phosphotyrosine (PDB 2QYQ) [26], or cacodylate (PDB 1BEH) [27] could bind to this conserved pocket. The conserved pocket is the only ligand-binding site of PEBPs identified by X-ray.

Besides crystallographic data, binding studies have been reported using other techniques. A study by affinity chromatography at pH 7.5 revealed that nucleotides could bind to the bovine brain PEBP (bPEBP), in the decreasing affinity order FMN>GTP>GDP>GMP>FAD>ATP>NADP>CTP>UTP>ADP [28]. Interactions of human and bovine PEBPs with morphine and morphine derivatives were characterized at pH 6.8 by noncovalent mass spectrometry [29]. Moreover, an NMR study of rat PEBP1 (rPEBP1) in near physiological conditions (pH, salt concentration, temperature) showed that the conserved pocket could accommodate various ligands such as 1,2-dihexanoyl-sn-glycero-3-phosphoethanolamine (DHPE), dihexanoylphosphatidylserine (DHPS), dihexanoylphosphatidylglycerol (DHPG), and dihexanoylphosphatidic acid (DHPA) [30]. The screening of a chemical library by NMR spectroscopy revealed three novel ligands for rPEBP1 that also bind to the protein pocket [31]. Shemon and co-workers (2009) were also interested in the interaction of rPEBP1 with locostatin ((S)-(+)-4-benzyl-3-crotonyl-2-oxazolidinone), since it is known to be a cell migration inhibitor whose cellular target is PEBP1 in cell lines from different origins [6]. However, locostatin itself could not be analyzed by NMR because of its limited solubility and the fact that it induced protein precipitation [32]. Contrary to locostatin, its precursor (S)-4-benzyl-2-oxazolidinone was compatible with NMR studies, which indicated a binding to the conserved pocket of rPEBP1 [32]. Furthermore, interactions between rat, mouse or human PEBPs and an inhibitor of phosphodiesterase-5 (PDE5) were shown by combining affinity based enrichment and mass spectrometry [33]. The binding was confirmed by solution based assays using absorbance, fluorescence and NMR spectroscopy.

However, some of these studies have emphasized the importance of both experimental conditions and the species of the PEBP used in the binding studies. A comparative NMR study at pH 7.4 and 6.0 showed that some ligands of hPEBP1 and bPEBP1 previously identified did not interact with rPEBP1 at pH 7.4, particularly PE [30] and the nucleotides GDP and GTP [31]. Furthermore, the binding study involving PEBPs from rat, mouse and human (rPEBP2, mPEBP1, mPEBP2 and hPEBP1) and an inhibitor of PDE5 evidenced different behaviors depending on the species and the tissues of origin of the protein, in spite of high sequence homologies and high similarities in the protein tertiary structures [33].

As previously mentioned, PEBP1 from bovine, human or rat is able to bind small ligands as well as proteins such as the Raf-1, MEK and ERK kinases [1,11]. Although the mechanism of PEBP1 binding to Raf-1 remains unknown, several studies have provided information about the binding region of Raf-1 on the one hand, and the binding region of PEBP1 on the other hand. Yeung and co-workers (2000) showed that the binding domains of Raf-1 with rPEBP1 were subdomains I and II, a region of approximately 100 amino acids [10]. More recent studies revealed that the phosphorylated N-region of Raf-1, encompassing amino acids 331 to 349, was sufficient to bind to rPEBP1 [34,35]. These data are consistent with rat and human PEBPs inhibiting Raf-1 by

preventing its phosphorylation at S338 and Y341 [12]. Besides, it has been shown that binding to Raf-1 requires the integrity of the rPEBP1 pocket [30,35] and is influenced by rPEBP1 pocket occupancy by another ligand (DHPE) [30]. Furthermore, the P74L mutation of the rPEBP1 pocket affects Raf-1 binding, but not the binding of DHPE to rPEBP1 [30]. Thus, the rPEBP1 lipid binding site may be distinct from the kinase binding site, and at least some of the pocket residues may be involved directly or indirectly in the interaction between rPEBP1 and Raf-1 [31]. Another work did support the idea of an indirect binding of Raf-1 to the PEBP1 pocket. Indeed, in contrast to DHPE, the locostatin precursor binding to the rPEBP1 pocket was not sufficient to interfere with Raf-1 binding [32]. The authors suggested that other residues of rPEBP1 may be critical for Raf-1 binding.

Thus, in spite of the numerous papers concerning PEBP1 binding ligands, one another's conclusions are not always in agreement. The works previously mentioned evidenced different binding behaviors as a function of (i) the species of PEBP1 (mouse, rat or human) [33], and (ii) the experimental conditions of binding, particularly the pH value [31]. Moreover, the binding of Raf-1 is complex and the binding site on PEBP1 is still unknown. In the present study, we investigated the human PEBP1 by NMR to determine the binding site of four different molecules: two nucleotides, GTP and FMN, because of their relatively high affinities for bPEBP1 [28], and a Raf-1 peptide of 19 amino acids in tri-phosphorylated and non-phosphorylated forms. The non-phosphorylated peptide RPRGQRDSSYYWEIEASEV is the minimal region 331–349 of Raf-1 required for rPEBP1 binding [34]. Three phospho-amino acids were incorporated at the positions Ser<sup>338/339</sup> and Tyr<sup>341</sup>, since the phosphorylation enhanced the binding to rPEBP1 as studied by surface plasmon resonance [34]. In order to examine the effects of experimental conditions such as pH, salt concentration, and temperature on binding, we investigated hPEBP1 in two sets of conditions: MES 10 mM pH 6.5 at 20°C, and HEPES 10 mM, NaCl 100 mM, pH 7.5 at 30°C (near physiological conditions). NMR titrations were also used to derive the affinity constants  $K_D$  of the ligands with hPEBP1. Native mass spectrometry (MS) was used as an alternative method for measuring  $K_D$  at pH 7.4/37°C for GTP and FMN and at pH 7.4/25°C or pH 6.6/20°C for the tri-phosphorylated Raf-1 peptide.

## Results

<sup>15</sup>N-<sup>1</sup>H heteronuclear single quantum coherence (HSQC) NMR experiment was used to study the interaction between hPEBP1 and four different ligands under two sets of experimental conditions. The HSQC spectrum of a protein monitors peptidic NH groups, giving one signal per amino acid at the level of the protein backbone. Since the chemical shift is very sensitive to the environment of the observed nuclei, the binding of the ligand affects the chemical shifts of both peptidic nitrogen and proton within the binding area. Hence, the residues involved in a binding can be determined using HSQC spectra of hPEBP1 in the presence or absence of a ligand.

Mammalian PEBPs crystal structures (PDB 2QYQ [26]) have revealed a remarkably conserved ligand-binding pocket. The hPEBP1 pocket can be defined by 16 residues at the surface of the protein: D70, A73, P74, Y81, W84, H86, V107, G108, G110, P111, P112, H118, Y120, L180, Y181, and L184 (Figure 1).

### GTP and FMN do bind to the ligand-binding pocket of hPEBP1

NMR titration of GTP in MES 10 mM pH 6.5 at 20°C revealed 34 residues in fast exchange on the NMR time scale

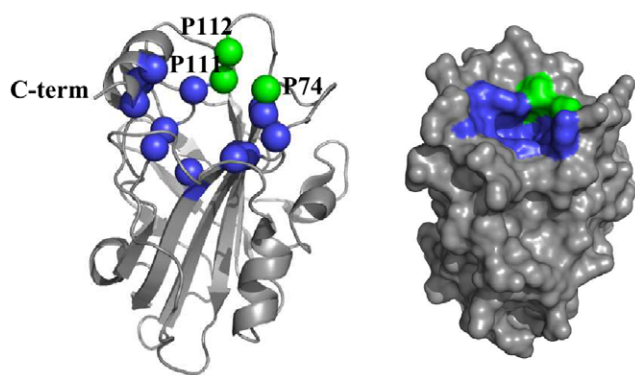

**Figure 1. The hPEBP1 pocket on the X-ray ribbon structure and on surface representation (PDB 2QYQ).** Residues indicated in blue are D70, A73, Y81, W84, H86, V107, G108, G110, H118, Y120, L180, Y181, and L184. Prolines 74, 111 and 112, which belong to the hPEBP1 pocket but are not detected by HSQC spectrum, are indicated in green. doi:10.1371/journal.pone.0036187.g001

(Figure 2A). Upon titration, the signals of these residues are shifted in both dimensions in the HSQC 2D plane, and the trajectories of the signals are linear, as observed for L184 (Figure 2B). This linear evolution indicates a single binding event [36]. Mapping of the residues affected by GTP binding on hPEBP1 structure corresponds to the conserved pocket of hPEBP1 (Figure 3A).

The chemical shift perturbations (CSP) values of the 34 perturbed residues were plotted versus the GTP concentration, and the data were fitted against equation 2 [37], giving a binding constant for each residue. Fitted titration data are shown in Figure 2C for six residues. CSP data were normalized to  $CSP_{max}$  (with the  $CSP_{max}$  estimate obtained from the curve fitting method used to calculate  $K_D$ ). The plot of normalized CSP ( $CSP/CSP_{max}$ ) versus the GTP concentration revealed a uniform behavior for 30 of the 34 perturbed residues (data not shown). The data of four residues (V27, G57, Y106, and G110) gave very different values of  $K_D$  compared to those calculated from the 30 other residues perturbed by GTP, and hence, were not considered for the estimation of the average binding constant of GTP. Among the four residues excluded for the  $K_D$  estimation of GTP, (i) two of them (V27 and G57) were isolated on the protein surface, (ii) one (Y106) belongs to the binding surface, but is far from the center of the hPEBP1 pocket, and (iii) the last one's peak intensity (G110) was too low to get data of quality. Thus, estimated from 30 perturbed residues, the average binding constant for GTP at pH 6.5/20°C is  $K_D = 669 \pm 140 \mu M$  (Table 1).

A total of 67 residues were affected upon FMN titration in MES 10 mM pH 6.5 at 20°C. Most of these residues were in slow exchange on the NMR time scale (39 residues in red on Figure 3B) and defined a binding surface centered on the conserved hPEBP1 pocket. 15 residues in fast exchange and 13 residues in intermediate exchange on the NMR time scale were also observed (residues in fast exchange in yellow, and residues in intermediate exchange in orange on Figure 3B). These residues are located in the outermost region of the binding surface. Since slow exchange usually indicates a higher affinity compared to fast or intermediate exchange, the data show that the pocket corresponds to the region with the greatest affinity for FMN. However, the binding constant could not be calculated from the intensity data of the residues in slow exchange because their peak intensities dropped sharply when the FMN concentration increased. Hence, the affinity was estimated from CSP data of residues in fast exchange:  $K_D = 14 \pm 9 \mu M$ . This affinity is therefore underestimated.

## GTP and FMN do bind to hPEBP1 in near physiological conditions

Since the experimental conditions can affect the binding behavior [31], the binding of GTP and FMN was also investigated under near physiological conditions: HEPES 10 mM pH 7.5, NaCl 100 mM, at 30°C.

The binding of GTP in near physiological conditions exhibited the same features as in MES 10 mM pH 6.5, 20°C, that is, the same binding site and a fast exchange on the NMR time scale. Among the 34 residues affected at pH 6.5/20°C, 26 were also perturbed at pH 7.5/NaCl 100 mM/30°C. However, the chemical shift perturbations were smaller in near physiological conditions ( $\langle CSP \rangle + 2\sigma = 0.058$  ppm) than at pH 6.5/20°C ( $\langle CSP \rangle + 2\sigma = 0.087$  ppm) (Figure 4). Moreover, the binding constant measured for GTP at pH 7.5/NaCl 100 mM/30°C was  $3425 \pm 1967 \mu M$ , which was higher than  $669 \pm 140 \mu M$  at pH 6.5/20°C (Table 1).

Similarly to the study performed at pH 6.5/20°C, the titration of FMN in near physiological conditions revealed residues in slow exchange on the NMR time scale, as well as residues in intermediate and fast exchange. The data evidenced the conserved hPEBP1 pocket as the binding surface in both conditions. Nevertheless, regarding the residues in slow exchange, the loss in intensity occurred at a higher FMN concentration at pH 7.5/NaCl 100 mM/30°C than at pH 6.5/20°C (data not shown). The estimation of  $K_D$  from CSP data of residues in fast exchange confirmed a lower affinity in near physiological conditions:  $K_D = 252 \pm 84 \mu M$  at pH 7.5/NaCl 100 mM/30°C versus  $K_D = 14 \pm 9 \mu M$  at pH 6.5/20°C (Table 1).

The formation of hPEBP1-nucleotide complexes was also monitored by native MS (data not shown). In ammonium bicarbonate (ABC) 20 mM at pH 7.4 and 37°C, hPEBP1 was found to bind with GTP and FMN with  $K_D$  values of  $89 \pm 48 \mu M$  and  $5 \pm 4 \mu M$ , respectively (Table 1). As in NMR, hPEBP1 showed a higher affinity for FMN than for GTP. In native MS,  $K_D$  values were measured in the absence of NaCl. In contrast, NMR measurements were performed in the presence of NaCl 100 mM, leading to a partial screening of electrostatic charges, and consequently to higher  $K_D$  values.

## The Raf-1 peptide does bind in tri-phosphorylated and non-phosphorylated forms to the ligand-binding pocket of hPEBP1

HSQC spectra displayed a total of 73 perturbed residues upon titration of the tri-phosphorylated Raf-1 peptide in MES 10 mM pH 6.5 at 20°C: 54 residues in slow exchange, 11 residues in intermediate exchange, and 8 residues in fast exchange (Figure 3C). Among these 73 perturbed residues, 11 residues were buried (V27, V67, L68, T69, D72, S109, V121, W122, V124, V151, and C168) and three were isolated at the surface of hPEBP1 (Q15, G57, and L58). Thus, after discrimination, we determined a single binding surface composed of 59 residues including and surrounding the conserved pocket. Neither the intensity data of the residues in slow exchange, nor the CSP data of the residues in fast exchange did allow us to estimate the affinity of the tri-phosphorylated Raf-1 peptide. Indeed, on the one hand, the peak intensities dropped sharply when the Raf-1 peptide concentration increased. And, on the other hand, the plot of CSP versus Raf-1 peptide concentration revealed no saturation upon titration.

However, the affinity of hPEBP1 for the tri-phosphorylated Raf-1 peptide was measured by native MS. A  $K_D$  value of  $45 \pm 12 \mu M$  was obtained in conditions of incubation similar to the conditions used for NMR, in ammonium acetate at pH 6.6 and 20°C

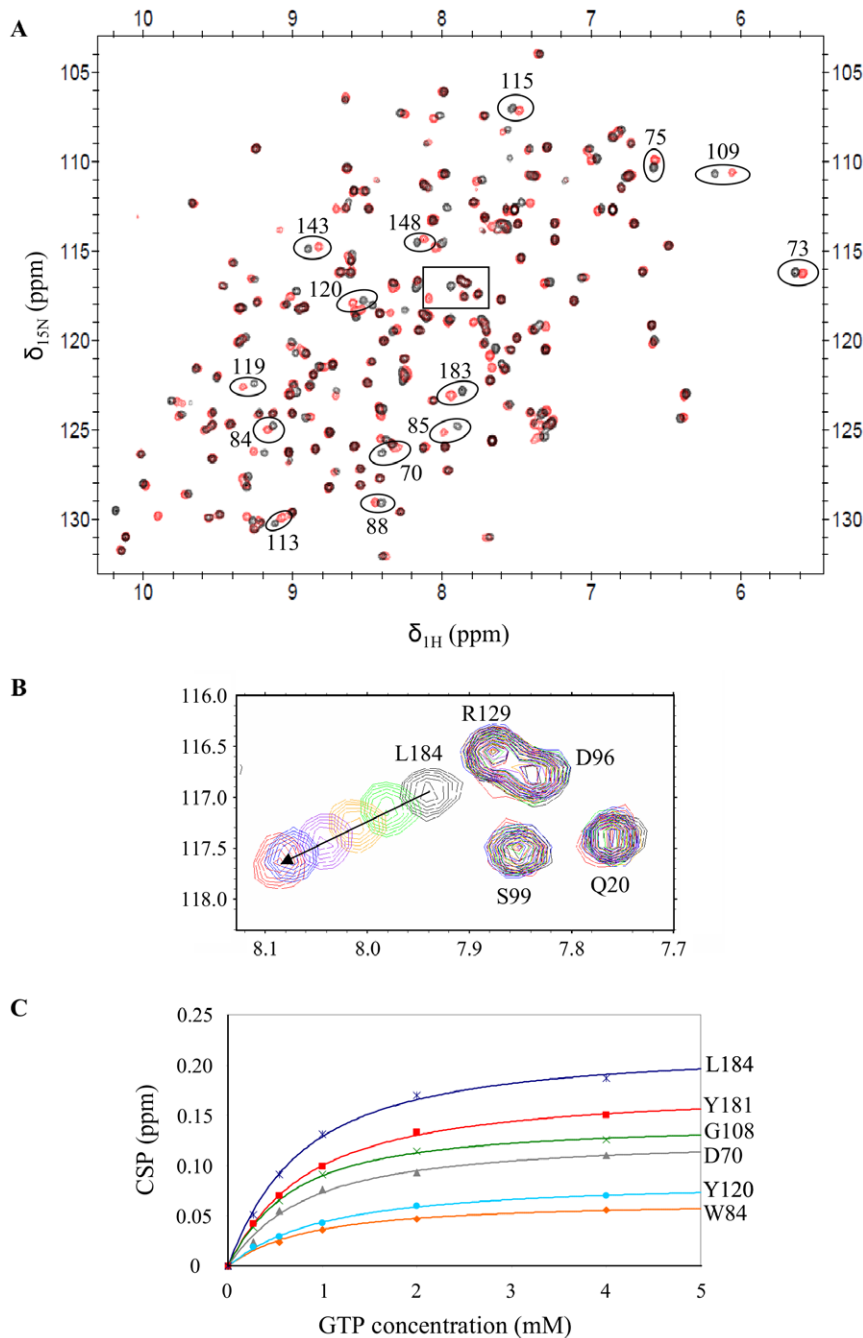

**Figure 2. Binding of GTP to hPEBP1 at pH 6.5/20°C by NMR.** (A) Overlay of  $^1\text{H}$ ,  $^{15}\text{N}$  HSQC spectra of hPEBP1 270  $\mu\text{M}$  in the absence (black) and presence (red) of GTP 4 mM. (B) Expansion of the selected HSQC region. Overlay of six HSQC spectra of hPEBP1 270  $\mu\text{M}$  with increasing concentration of GTP: 0 mM (black), 0.27 mM (green), 0.54 mM (orange), 1 mM (purple), 2 mM (blue), and 4 mM (red). (C) Plot of CSP versus GTP concentration; data fitted against equation of  $K_D$  (see M&M) for the 6 residues indicated on Figure 3A. doi:10.1371/journal.pone.0036187.g002

(Figure 5). In ABC at pH 7.4 and 25°C, a  $K_D$  of  $11 \pm 3 \mu\text{M}$  was found, a value close to the  $K_D$  of 20  $\mu\text{M}$  determined in solution with rPEBP1 [34]. All these values are within the same order of magnitude.

For the NMR titration with the non-phosphorylated Raf-1 peptide in MES 10 mM pH 6.5 at 20°C, only 33 residues were perturbed: 16 residues in slow exchange, 6 residues in intermediate exchange, and 11 residues in fast exchange (Figure 3D). After discrimination of the buried residues (V27, V46, D72, and S109)

and those isolated at the surface (Y29), three surface patches were identified. Two small surfaces were formed by L25-H26-V34-G166 and W55/D56/G57/L58/V164 on the opposite side of the conserved pocket of hPEBP1, but were not large enough to be considered as potential binding surfaces. Besides, 19 perturbed residues defined a surface centered on the conserved pocket similarly to the other ligands. It is worth noticing that the corresponding binding surface was larger for the tri-phosphorylated peptide. In addition, comparison of the peak intensities for



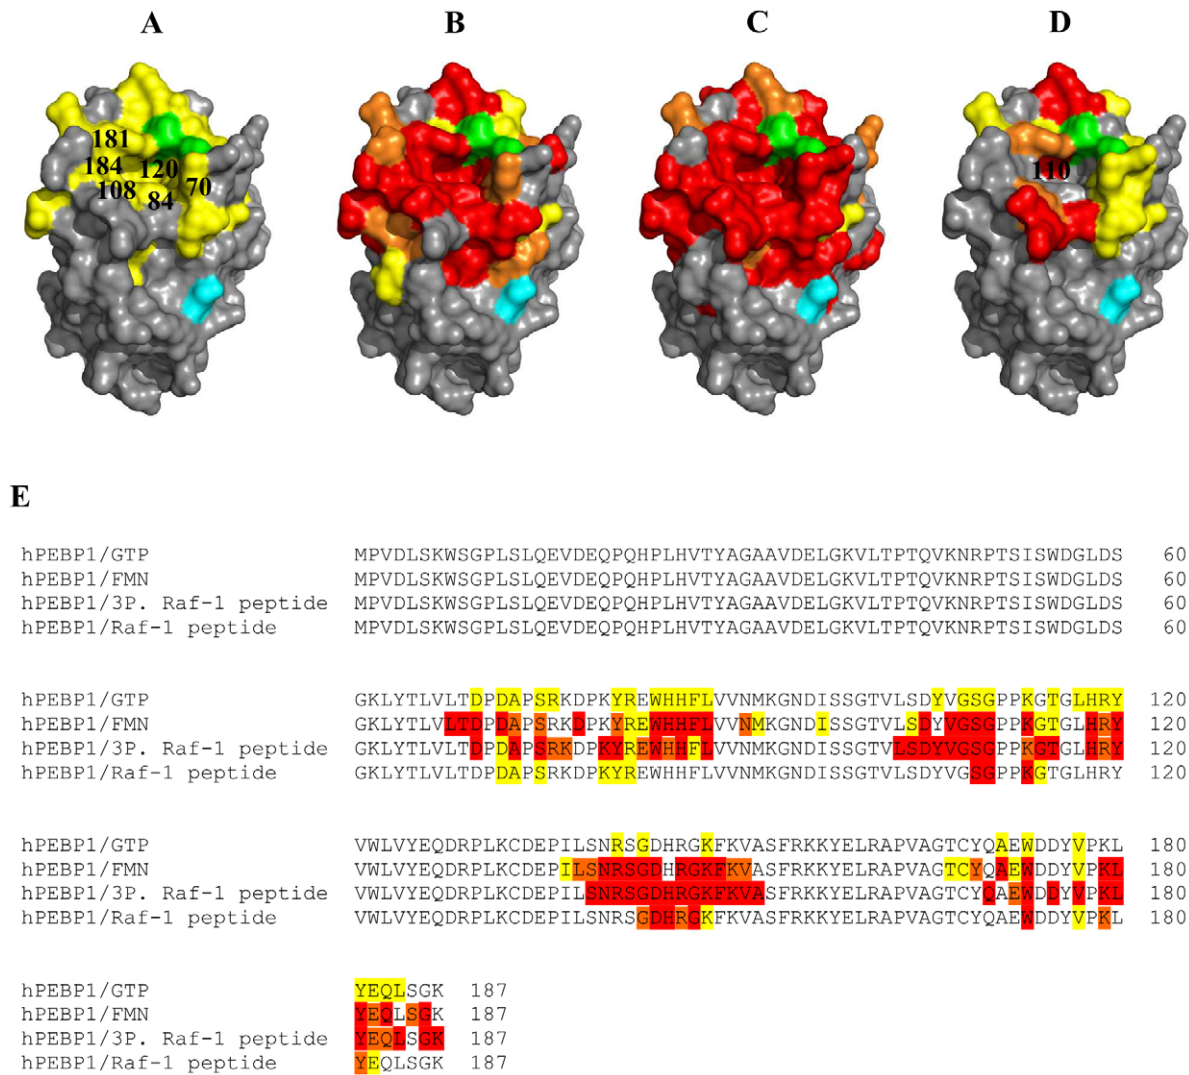

**Figure 3. Binding site of ligands at hPEBP1 surface at pH 6.5/20°C.** Mapping of amino acid residues whose HSQC peak is significantly affected by (A) GTP, (B) FMN, (C) the tri-phosphorylated Raf-1 peptide, and (D) the non-phosphorylated Raf-1 peptide at the surface of hPEBP1 (X-Ray; PDB 2QYQ). Red = residues in slow exchange; orange = residues in intermediate exchange; yellow = residues in fast exchange. Prolines 74, 111 and 112, which belong to the hPEBP1 pocket but are not detected by HSQC spectrum, are indicated in green. Serine 153 is indicated in cyan as a reference point. (E) hPEBP1 sequence alignment (accession number P30086) indicating the residues defining the binding surface of GTP, FMN, the tri-phosphorylated Raf-1 peptide (3P. Raf-1 peptide), and the non-phosphorylated Raf-1 peptide (Raf-1 peptide). The color code is similar to (D). doi:10.1371/journal.pone.0036187.g003

both Raf-1 peptides titrations at similar protein/ligand ratios revealed that the intensity loss was less severe for the non-phosphorylated peptide (data not shown). Altogether, these data suggest a lower affinity of hPEBP1 for the non phosphorylated Raf-1 peptide compared to the tri-phosphorylated Raf-1 peptide, in agreement with literature reports [34]. However, we could not confirm this with a binding constant value. The severe drop of

peak intensities for the residues in slow exchange and the non-saturation of CSP for the residues in fast exchange upon titration did not allow us to estimate the  $K_D$  as mentioned for the tri-phosphorylated Raf-1 peptide.

One additional difference could be observed between the two peptides regarding the perturbation of the pocket itself. The conserved pocket of hPEBP1 is formed by 16 residues at the

**Table 1.**  $K_D$  values of nucleotides derived from NMR and MS spectrometry.

| Compound | NMR $K_D$ ( $\mu$ M) pH 6.5/20°C | NMR $K_D$ ( $\mu$ M) pH 7.5/NaCl 100 mM/30°C | MS $K_D$ ( $\mu$ M) pH 7.4/37°C |
|----------|----------------------------------|----------------------------------------------|---------------------------------|
| GTP      | 669±140                          | 3425±1967                                    | 89±48                           |
| FMN      | 14±9                             | 252±84                                       | 5±4                             |

doi:10.1371/journal.pone.0036187.t001

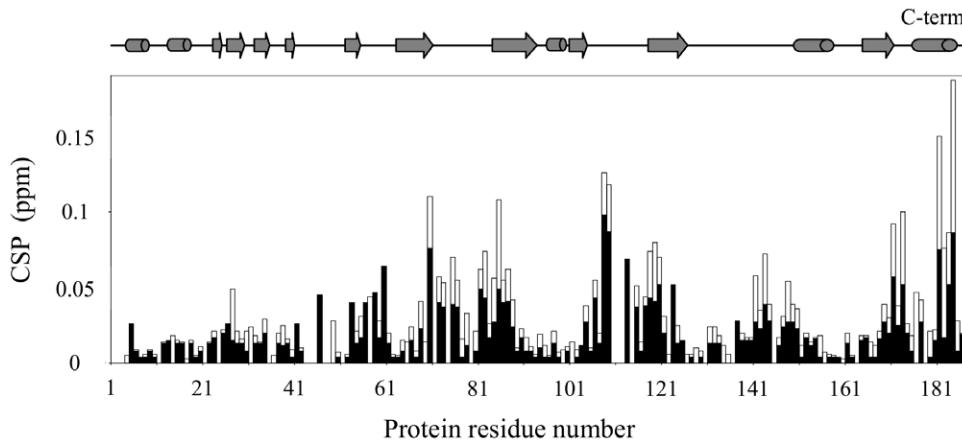

**Figure 4. Comparison of GTP binding to hPEBP1 in two conditions.** hPEBP1 chemical shift perturbations at GTP saturation concentration for both tested conditions: GTP 4 mM at pH 6.5/20°C (white), and GTP 6.4 mM at pH 7.5/NaCl 100 mM/30°C (black). CSP values are higher at pH 6.5/20°C than pH 7.5/NaCl 100 mM/30°C (hPEBP1 270 and 100  $\mu$ M, respectively). doi:10.1371/journal.pone.0036187.g004

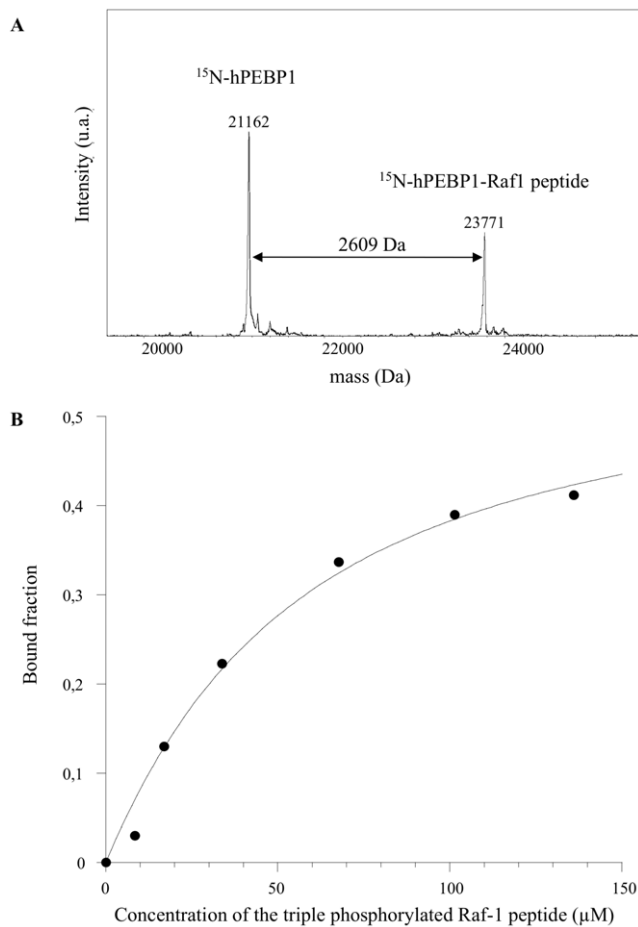

**Figure 5. Binding of the tri-phosphorylated Raf-1 peptide to hPEBP1 by Mass Spectrometry.** (A) ESI mass spectrum of hPEBP1 in complex with the tri-phosphorylated Raf-1 peptide, deconvoluted from 10+, 9+ and 8+ charge states. The complex was formed by incubating 18  $\mu$ M hPEBP1 with 67.6  $\mu$ M Raf-1 peptide at 20°C in 20 mM  $\text{NH}_4\text{OAc}$ , pH 6.6. (B) MS-measured hPEBP1 bound fraction as a function of the tri-phosphorylated Raf-1 peptide concentration. doi:10.1371/journal.pone.0036187.g005

surface of the structure PDB 2QYQ [26]. Three prolines are among these 16 residues, hence only 13 residues of the pocket can be detected by HSQC. Whereas all these 13 residues were perturbed upon binding of the tri-phosphorylated Raf-1 peptide, only four of them were affected by the binding of the non-phosphorylated peptide: three residues (A73, Y81, and G110) were located on the edge of the pocket, and only G110 was in the bottom of the pocket.

## Discussion

The present study demonstrates and/or confirms the binding of hPEBP1 to four ligands, two nucleotides and one Raf-1 peptide in tri-phosphorylated and non-phosphorylated forms. Although the affinities for GTP and FMN decrease as pH, salt concentration, and temperature increased from pH 6.5/NaCl 0 mM/20°C to pH 7.5/NaCl 100 mM/30°C according to our NMR data, both ligands clearly do bind under near physiological conditions. Moreover, all four ligands bind to the same region centered on the conserved pocket previously identified by X-ray crystallography.

### The binding of the two nucleotides

The binding of GTP and FMN was evidenced in two sets of conditions (MES 10 mM pH 6.5 at 20°C, and HEPES 10 mM, NaCl 100 mM, pH 7.5 at 30°C) and involved hPEBP1 pocket as well. However, hPEBP1 shows a higher affinity for FMN than for GTP, in agreement with literature reports concerning bPEBP1 [28]. Moreover, a higher affinity was observed at pH 6.5/20°C than at pH 7.5/NaCl 100 mM/30°C for both GTP and FMN (Table 1). We carried out complementary experiments to differentiate the effect of the pH alone. Therefore, FMN was studied in HEPES 10 mM pH 7.5 at 20°C to compare with the binding study in MES 10 mM pH 6.5 at 20°C. Similar to the data at pH 6.5, the titration of FMN at pH 7.5 showed a majority of residues in slow exchange, but also residues in intermediate and fast exchange. Altogether, the perturbed residues defined the hPEBP1 pocket as the binding site of FMN at pH 7.5/20°C (data not shown). The measured affinity indicated no significant effect of the pH:  $K_D = 14 \pm 11 \mu\text{M}$  at pH 7.5/20°C (estimation from CSP data of 9 residues in fast exchange) versus  $K_D = 14 \pm 9 \mu\text{M}$  at pH 6.5/20°C (estimation from CSP data of 14 residues in fast exchange). Concerning the effect of salt alone, it is important to note that the presence of NaCl 100 mM induced no change on the

HSQC spectrum of hPEBP1 indicating no conformational modification. Since the pH had no significant effect on FMN binding and no conformational change of the protein was induced by the presence of NaCl 100 mM, the decrease of nucleotides affinity in near physiological conditions was likely due to the temperature rise as a consequence of Van't Hoff law in chemical thermodynamics.

The interaction between hPEBP1 and GTP evidenced at pH 7.5/NaCl 100 mM/30°C was physiologically relevant despite the high concentrations of GTP used (from 0 to 6.4 mM to get saturation). Whereas the average concentration of GTP is 0.47 mM in mammalian cells and fluids [38], local concentration of GTP could be higher, particularly near the plasma membrane where receptors are coupled with heterotrimeric GTP-binding proteins. hPEBP1 is known to regulate G protein-coupled receptor signaling *in vivo* [39] and several studies have shown that hPEBP1 is associated with the G protein-coupled receptor kinase (GRK) [40]. In particular, hPEBP1 phosphorylated by PKC binds to GRK2 (G receptor kinase 2), inhibiting its activity and preventing receptor internalisation [14]. Thus, the GTP concentrations used in our experiments were certainly in the same order of magnitude as the GTP amounts encountered near the plasma membrane of living cells. Moreover, similar concentrations were used for GTP and FMN in order to compare the affinities obtained with both nucleotides.

The evidence of GTP binding to hPEBP1 in near physiological conditions contrasts with the NMR study of Shemon and co-workers (2010). These authors observed that GTP did not cause significant chemical shift perturbations for rPEBP1 at pH 7.4/NaCl 100 mM/30°C, even at a very high ligand concentration (130 mM GTP for 75 µM rPEBP1) [31]. Since similar conditions of pH, salt and temperature and identical NMR techniques were used in both studies, this result highlights the difference in binding behavior between the rat and the human PEBPs in spite of an 83% sequence identity (Figure 6). Dadvar and co-workers (2009) have also evidenced different binding behaviors between PEBPs from two species [33]. In spite of an 84% sequence identity, the *in vitro* binding of an inhibitor of PDE5 was significantly more efficient with the mouse PEBP (mPEBP2) than with hPEBP1. Since PEBP has multiple isoforms in each species, and the number of isoforms is different from one species to another, it seems possible that the binding properties of a given PEBP are different

from those of its counterpart in another species. Thus, the results obtained for one species cannot be generalized to the other.

### The binding of the Raf-1 peptide in tri-phosphorylated and non-phosphorylated forms

hPEBP1 pocket did bind the tri-phosphorylated Raf-1 peptide (Figure 3C), as previously shown by surface plasmon resonance [34], or for rPEBP [30,35]. In particular, our data showed that residues A73 and S75 surrounding P74 as well as residue H86 were involved in the binding, supporting the study of Granovsky and co-workers (2009) that showed the effect of the mutations P74L and H86A in the pocket on the binding of rPEBP1 with Raf-1 kinase. Besides, although S153 was not perturbed itself, residues K150, V151, A152 immediately preceding S153 in α-helix H<sub>1</sub> of hPEBP1 were affected by the tri-phosphorylated Raf-1 peptide binding. This could agree with the fact that rPEBP1 dissociates from Raf-1 upon phosphorylation by PKC on S153 (Figure 3C) [13,14].

Raf-1 peptide binds more tightly when it is phosphorylated, as previously demonstrated by Park and co-workers [34]. As expected, the binding site of the non-phosphorylated Raf-1 peptide was centered on the conserved pocket (Figure 3D), involving residue G110 at the bottom of the pocket. However, most residues of the pocket were not involved in the binding. Indeed, residues in the vicinity of the pocket, rather than those within the pocket, were perturbed and hence, seemed to be required for interaction with Raf-1, as previously suggested by Shemon and co-workers (2009, 2010) [31,32].

Since our data demonstrated differences between rat and human PEBPs for GTP binding, we investigated the interaction with the locostatin precursor (S)-4-benzyl-2-oxazolidinone (Sigma #294640), for which the binding to rPEBP1 has been evidenced by NMR under near physiological conditions (Tris-HCl 50 mM pH 7.4, NaCl 100 mM, 30°C). The titration of the locostatin precursor with hPEBP1 (in HEPES 10 mM pH 7.5, NaCl 100 mM, 30°C) revealed 19 residues in fast exchange on the NMR time scale (data not shown). Analysis of the CSP values of these 19 residues provided a binding constant equal to  $173 \pm 19$  µM. The mapping of the perturbed residues on the X-ray structure of hPEBP1 shows that the locostatin precursor binds to the hPEBP1 pocket as previously shown for rPEBP1 under similar conditions (no K<sub>D</sub> value was measured for rPEBP1) [32].

|        |                                                                |     |
|--------|----------------------------------------------------------------|-----|
| hPEBP1 | MPVDLSKWSGPLSLQEVDEQPQHPLHVTYAGAAVDELGKVLTPQTQVKNRPTSIISWDGLDS | 60  |
| rPEBP1 | MAADISQWAGPLSLQEVDEPPQHALRVDYGGVTVDDELGKVLTPQVMNRPSISISWDGLDP  | 60  |
| mPEBP2 | MPTDMSMWTGPLSLHEVDEQPQHLLRVTYTEAEVEELGQVLTPTQVXHRPGSISWDGLDP   | 60  |
|        | * . . . * * :*****:**** ** * * . * :***:***** :** ***** .      |     |
|        |                                                                |     |
| hPEBP1 | GKLYTLVLTDPDAPSRKDKPKYREWHHFLVNNMKGNDISSGTVLSDYVGSPPKGTGLHRY   | 120 |
| rPEBP1 | GKLYTLVLTDDPDAPSRKDKPKFREWHHFLVNNMKGNDISSGTVLSEYVGSPPKDTGLHRY  | 120 |
| mPEBP2 | GKLYTLVLTDDPDAPSRKDKPKVYREWHHFLVNNMKGNDISSGNVLSDYVGSPPKGTGLHRY | 120 |
|        | *****:***** . * . ***** ***** . ***:***** . *****              |     |
|        |                                                                |     |
| hPEBP1 | VVLVYEQDRPLKCEPILSNRSGDHRGKFKVASFRKKYELRAPVAGTCYQAEDDYYVPKL    | 180 |
| rPEBP1 | VVLVYEQEQLNCEPILSNKSGDNRGKFKVESFRKKYHLGAPVAGTCFQAEDDVSVPKL     | 180 |
| mPEBP2 | VVLVYQQDKPLKCEPILTNRSGDHRGKFKTAFAFRKKYHLGAPVAGTCYQAEDDVSVPKL   | 180 |
|        | *****:*.:.*. *****:*.:***:***** . :*****.* *****:***** . ****  |     |
|        |                                                                |     |
| hPEBP1 | YEQLSGK                                                        | 187 |
| rPEBP1 | HDQLAGK                                                        | 187 |
| mPEBP2 | YKQLSGK                                                        | 187 |
|        | : . ** : **                                                    |     |

**Figure 6. Multiple sequence alignment of human PEBP1 (hPEBP1, accession number P30086), rat PEBP1 (rPEBP1, accession number P31044) and mouse PEBP2 (mPEBP2, accession number Q8VIN1).** The hPEBP1 residues defining the binding surface of GTP at pH 6.5 and 20°C are colored yellow.

doi:10.1371/journal.pone.0036187.g006

In the present study, we confirm the binding of the human PEBP1 to two nucleotides (GTP and FMN) and a Raf-1 peptide (in tri-phosphorylated and non-phosphorylated forms) in different conditions using NMR and mass spectrometry. All ligands bind to the same region centered on the conserved ligand-binding pocket of hPEBP1 previously identified by X-ray crystallography. Our work confirms that residues in the vicinity of the pocket rather than those within the pocket seem to be required for interaction with Raf-1 [31,32]. The affinity constants  $K_D$  were estimated by NMR titration and/or native mass spectrometry. Although the affinities for GTP and FMN were lower at pH 7.5/NaCl 100 mM/30°C than at pH 6.5/20°C, both nucleotides clearly did bind under near physiological conditions. Since no interaction was shown between the rat PEBP and GTP by NMR in near physiological conditions [31], our study demonstrates the specific binding behavior of the human PEBP1 and highlights the importance of the studied species. In a therapeutic perspective, the choice to study human PEBP1 is a critical factor in drawing conclusions on human pathologies.

## Materials and Methods

Interaction of hPEBP1 was studied with four different ligands: two nucleotides, GTP and FMN, and a Raf-1 peptide of 19 amino acids in tri-phosphorylated and non-phosphorylated forms.

### Materials

Guanosine triphosphate (GTP), flavin mononucleotide (FMN),  $\beta$ -mercaptoethanol (BME), and ammonium bicarbonate (ABC) were purchased from Sigma (St. Louis, MO). Ammonium chloride  $^{15}\text{N}$  98% ( $^{15}\text{NH}_4\text{Cl}$ ) was purchased from Cortecnet (Voisins-Le-Bretonneux, France). Ammonium acetate ( $\text{NH}_4\text{OAc}$ ) was purchased from Merck (Darmstadt, Germany) and formic acid 90% (FA) from Fisher (Loughborough, UK). The Raf-1 peptide in tri-phosphorylated and non-phosphorylated forms was prepared by conventional solid-phase peptide synthesis using the Fmoc strategy. Fmoc-Ser(PO(OBzl)OH)-OH and Fmoc-Tyr(PO(OBzl)OH)-OH were used as phosphoderivatives. They were obtained by combining both a manual chain assembly method and an automated one with a ABI 433A synthesizer (Applied Biosystems). Details of the synthesis strategy will be described elsewhere. All solvents and buffers were prepared using 18 M $\Omega$  purified water (MilliQ reagent grade system, Millipore).

### Production and purification of $^{15}\text{N}$ hPEBP1

$^{15}\text{N}$  hPEBP1 was produced according to the method described by Marley [41]. The cDNA coding the human PEBP1 has been inserted in pET31b plasmid [29]; *E. coli* BL21 DE3 cells were used to overexpress hPEBP1. The general protocol is as follows: 2 L of an *E. coli* BL21 (DE3, pET31b) overnight preculture were inoculated into 60 L of LB. Upon reaching  $\text{OD}_{600} \sim 0.7$ , the cells were pelleted by centrifugation. The cell pellet was resuspended in 15 L of M9 medium with  $^{15}\text{NH}_4\text{Cl}$  1 g/L, ampicillin 50  $\mu\text{g mL}^{-1}$ , and then incubated to allow the recovery of growth and the clearance of unlabeled metabolites. After 1 h, protein expression was induced by addition of isopropyl-1-thio- $\beta$ -galactoside (IPTG) to a final concentration of 1 mM. After a 2–3 h incubation period, the cells were harvested and frozen at  $-20^\circ\text{C}$ .

The purification of hPEBP1 was performed according to a two-step procedure involving two different ion exchange chromatography columns. The frozen cell pellet was resuspended in water and loaded into a French Press cell disruptor. The cell lysate was centrifuged at 14,000 *g* for 20 min at  $4^\circ\text{C}$ . The clear supernatant was dialysed overnight against Tris 20 mM, EDTA 1 mM, BME 1 mM, pH 8.0. The dialysed cell lysate was loaded onto an anion exchange

chromatography column (Q Sepharose Fast Flow, Amersham) and eluted with Tris 20 mM, BME 1 mM, pH 8.0. The fractions containing hPEBP1, identified with 18% SDS-PAGE, were gathered and dialysed overnight against NaAc 10 mM, BME 1 mM, pH 5.5. The dialysed sample was loaded onto a cation exchange chromatography column (Sp Sepharose High Performance, Amersham). hPEBP1 was eluted with a linear gradient 0–1 M NaCl. The fractions containing the protein were gathered and dialysed against MES 10 mM, BME 1 mM, pH 6.5. The protein solution was aliquoted and stored at  $4^\circ\text{C}$ . The final protein purity was assessed according to 18% SDS-PAGE gel and mass spectrometry.

### hPEBP1 and nucleotides purification for mass spectrometry analysis

Non-labeled recombinant hPEBP1 purified as previously described [29] was used for mass spectrometry analysis. To prevent  $\text{Na}^+$  adduct formation, the commercial GTP and FMN nucleotides used in native MS were desalted. For this purpose, a protocol derived from the RNA-desalting procedure of Limbach et al. (1995) [42] was set up [43].

### NMR measurements

The interactions between hPEBP1 100–270  $\mu\text{M}$  and the four selected ligands were investigated by  $^{15}\text{N}$ - $^1\text{H}$  heteronuclear single quantum coherence (HSQC) NMR experiments with a sensitivity enhancement and gradient selected coherence.  $^1\text{H}$ ,  $^{15}\text{N}$  HSQC spectra were recorded at 20 or  $30^\circ\text{C}$  on a Bruker 500 MHz or a Varian Inova 600 MHz spectrometer. Two experimental sets of conditions were tested: MES 10 mM pH 6.5 at  $20^\circ\text{C}$ , and HEPES 10 mM, NaCl 100 mM pH 7.5 at  $30^\circ\text{C}$ .

Although the backbone assignment is available for the human protein at pH 4/ $25^\circ\text{C}$  at the BMRB (BMRB 16992) [44], we performed our own backbone amide assignment of free hPEBP1 at pH 6.5/ $25^\circ\text{C}$  (BMRB 18204) using 3D TROSY-based HNCA, HN(CO)CA, HNCACB, HN(CO)CACB, HNC(O) and HN(CA)CO experiments [45].  $^1\text{H}$  and  $^{15}\text{N}$  chemical shifts were assigned for 96.5% of non-prolines residues: all residues except Met1, Val3, Asp35, Gln45, Lys47 and Lys187 (total residues: 187; non-prolines residues: 172; assigned residues: 166/172). Measurements were performed on a Bruker Avance spectrometer 800 MHz equipped with a cryogenic  $^1\text{H}\{^{13}\text{C}/^{15}\text{N}\}$  triple-resonance probe.

### NMR titrations

In the simple case of protein-ligand interactions, the free and the bound states are observed during the titration. The interpretation of an NMR spectrum, such as an HSQC, depends on the rate of exchange between the bound and the free forms. Three different cases can be observed. If the complex rate of dissociation is very slow, two separate resonances are observed at the positions corresponding to the chemical shifts characteristic of the two states (free and bound). During the titration, the intensity of the free resonance decreases while the bound resonance one appears and goes up. This regime corresponds to slow chemical exchange on the NMR time scale. If the complex rate of dissociation is very fast, only a single resonance is observed, whose position is the average of the chemical shifts of the two states, weighted by their relative populations. In this case, Chemical Shift Perturbations (CSP) are observed, *i.e.* the chemical shift evolves as the ligand concentration increases. This regime corresponds to fast exchange on the NMR time scale, and is typical for weaker affinity complexes. In the intermediate chemical exchange case, in addition to CSP, complex changes will affect the line shape that results in the observation of very broad signals with low intensity.



In the fast exchange regime, CSP can be measured from  $^{15}\text{N}$ -HSQC spectra using the equation:

$$\text{CSP} = \sqrt{(\Delta\delta_{1H})^2 + (0.17 \times \Delta\delta_{15N})^2}, \quad (1)$$

with  $\delta$  being the chemical shift in ppm [37].

A threshold value was estimated in order to determine significant CSP. In a first step, all the CSP are considered and the average ( $\langle\text{CSP}\rangle$ ) plus two times the standard deviation ( $\sigma$ ) is calculated. Then, the highest CSP ( $\text{CSP} \geq \langle\text{CSP}\rangle + 2\sigma$ ) are removed from the data and new average and new standard deviation calculated. The operation is repeated until the convergence is reached. The final value  $\langle\text{CSP}\rangle + 2\sigma$  for the residues not significantly perturbed corresponds to the threshold.

Once the residues involved in the binding were selected, the experimental data were fitted with the quadratic equation 2 using SigmaPlot 9.0 in order to obtain the dissociation constant value ( $K_D$ ):

$$\text{CSP} = \frac{\text{CSP}_{\max}}{2 \times [P]_0} \left[ ([L] + [P]_0 + K_D) - \sqrt{([L] + [P]_0 + K_D)^2 - 4 \times [P]_0 \times [L]} \right], \quad (2)$$

where  $[P]_0$  and  $[L]$  are the total protein and ligand concentrations, respectively [46]. A  $K_D$  value was estimated for each residue involved in the binding, and then an average was calculated.

In the slow exchange regime, intensity ratios  $I/I_0$  can be calculated upon titration with  $I$  the peak intensity at a fixed concentration of ligand and  $I_0$  the initial peak intensity. A method similar to the one explained for CSP was used to discriminate the significant loss of intensity. The threshold corresponds to the average of the intensity ratios values ( $\langle I/I_0 \rangle$ ) minus two times the standard deviation ( $\sigma$ ) for the residues not significantly perturbed.

Once the significant perturbations were discriminated, the perturbed residues were taken into account for the determination

## References

- Yeung K, Seitz T, Li S, Janosch P, McFerran B, et al. (1999) Suppression of Raf-1 kinase activity and MAP kinase signalling by RKIP. *Nature* 401: 173–177.
- Yeung KC, Rose DW, Dhillon AS, Yaros D, Gustafsson M, et al. (2001) Raf kinase inhibitor protein interacts with NF-kappaB-inducing kinase and TAK1 and inhibits NF-kappaB activation. *Mol Cell Biol* 21: 7207–7217.
- Klysik J, Theroux SJ, Sedivy JM, Moffit JS, Bockelheide K (2008) Signaling crossroads: the function of Raf kinase inhibitory protein in cancer, the central nervous system and reproduction. *Cell Signal* 20: 1–9.
- Lee HC, Tian B, Sedivy JM, Wands JR, Kim M (2006) Loss of Raf kinase inhibitor protein promotes cell proliferation and migration of human hepatoma cells. *Gastroenterology* 131: 1208–1217.
- Sagisaka T, Matsukawa N, Toyoda T, Uematsu N, Kanamori T, et al. (2010) Directed neural lineage differentiation of adult hippocampal progenitor cells via modulation of hippocampal cholinergic neurostimulating peptide precursor expression. *Brain Res* 1327: 107–117.
- Zhu S, Mc Henry KT, Lane WS, Fenteany G (2005) A chemical inhibitor reveals the role of Raf kinase inhibitor protein in cell migration. *Chem Biol* 12: 981–991.
- Dahl A, Eriksson PS, Persson AI, Karlsson G, Davidsson P, et al. (2003) Proteome analysis of conditioned medium from cultured adult hippocampal progenitors. *Rapid Commun Mass Spectrom* 17: 2195–2202.
- Odabaci G, Chatterjee D, Jazirehi AR, Goodglick L, Yeung K, et al. (2004) Raf-1 kinase inhibitor protein: structure, function, regulation of cell signaling, and pivotal role in apoptosis. *Adv Cancer Res* 91: 169–200.
- Kolch W (2000) Meaningful relationships: the regulation of the Ras/Raf/MEK/ERK pathway by protein interactions. *Biochem J* 351: 289–305.
- Yeung K, Janosch P, McFerran B, Rose DW, Mischak H, et al. (2000) Mechanism of suppression of the Raf/MEK/extracellular signal-regulated kinase pathway by the raf kinase inhibitor protein. *Mol Cell Biol* 20: 3079–3085.
- Saab F, Routier S, Mérou J-Y, Bénétou V, Schoentgen F (2010) Comparison of the efficiencies of two TR-FRET methods to detect in vitro natural and synthesized inhibitors of the Raf/MEK/ERK signaling pathway. *Int J High Throughput Screen* 1: 81–98.
- Trakul N, Menard RE, Schade GR, Qian Z, Rosner MR (2005) Raf kinase inhibitory protein regulates Raf-1 but not B-Raf kinase activation. *J Biol Chem* 280: 24931–24940.
- Corbit KC, Trakul N, Eves EM, Diaz B, Marshall M, et al. (2003) Activation of Raf-1 signaling by protein kinase C through a mechanism involving Raf kinase inhibitory protein. *J Biol Chem* 278: 13061–13068.
- Lorenz K, Lohse MJ, Quitterer U (2003) Protein kinase C switches the Raf kinase inhibitor from Raf-1 to GRK-2. *Nature* 426: 574–579.
- Keller ET (2004) Metastasis suppressor genes: a role for raf kinase inhibitor protein (RKIP). *Anticancer Drugs* 15: 663–669.
- Fu Z, Smith PC, Zhang L, Rubin MA, Dunn RL, et al. (2003) Effects of raf kinase inhibitor protein expression on suppression of prostate cancer metastasis. *J Natl Cancer Inst* 95: 878–889.
- Keller ET, Fu Z, Yeung K, Brennan M (2004) Raf kinase inhibitor protein: a prostate cancer metastasis suppressor gene. *Cancer Lett* 207: 131–137.
- Hagan S, Al-Mulla F, Mallon E, Oien K, Ferrier R, et al. (2005) Reduction of Raf-1 kinase inhibitor protein expression correlates with breast cancer metastasis. *Clin Cancer Res* 11: 7392–7397.
- Dangi-Garimella S, Yun J, Eves EM, Newman M, Erkland SJ, et al. (2009) Raf kinase inhibitor protein suppresses a metastasis signalling cascade involving LIN28 and let-7. *EMBO J* 28: 347–358.
- Chatterjee D, Bai Y, Wang Z, Beach S, Mott S, et al. (2004) RKIP sensitizes prostate and breast cancer cells to drug-induced apoptosis. *J Biol Chem* 279: 17515–17523.
- Maki M, Matsukawa N, Yuasa H, Otsuka Y, Yamamoto T, et al. (2002) Decreased expression of hippocampal cholinergic neurostimulating peptide

of the binding surface when (i) the perturbation reaches saturation upon titration, (ii) the residues are located at the surface, and (iii) define a contiguous surface patch [36].

In the case of the slow exchange regime, the binding constant can rarely be calculated because peak intensities are not measured with enough accuracy.

## Native mass spectrometry

All MS measurements were performed in an ESI-ion trap model Esquire HCT or Ultra HCT PTM Discovery (Bruker, Bremen, Germany), or in a maXis ESI-UHR-Qq-TOF (Bruker). Complexes were formed by incubating hPEBP1 with a range of ligand concentrations in ammonium bicarbonate 20 mM/formic acid buffer, pH 7.4 at 37°C or in ammonium acetate 20 mM, pH 6.6 at 20°C. After incubation, samples were treated with a Zeba micro gel filtration device with a 7 kDa cut-off (Thermo Scientific, Waltham, MA) prior to MS measurement, or analyzed directly in MS. The  $K_D$  was determined by measuring the bound protein fraction by native MS. Details of the development of the native MS method for  $K_D$  determination are described in the work of Jaquillard *et al.* (in press) [43].

## Acknowledgments

We thank F. Bouillenne and A.-M. Matton from CIP (ULg) for assistance in the purification of  $^{15}\text{N}$  hPEBP1.

We thank L. Errien for assistance in the purification of non-labeled recombinant hPEBP1.

We thank F. Löhr at the BMRZ NMR facility (Frankfurt) for NMR spectra used for hPEBP1 backbone resonance assignment.

We thank V. Aucagne for assistance in the production of Raf-1 peptides.

## Author Contributions

Conceived and designed the experiments: LT L. Jaquillard L. Jouvensal F. Schoentgen MC CD. Performed the experiments: LT L. Jaquillard L. Jouvensal CD. Analyzed the data: LT L. Jaquillard MC CD. Contributed reagents/materials/analysis tools: AIK F. Saab AD AB. Wrote the paper: LT F. Schoentgen CD.

- precursor protein mRNA in the hippocampus in Alzheimer disease. *J Neuropathol Exp Neurol* 61: 176–185.
22. Hickox DM, Gibbs G, Morrison JR, Sebire K, Edgar K, et al. (2002) Identification of a novel testis-specific member of the phosphatidylethanolamine binding protein family, pebp-2. *Biol Reprod* 67: 917–927.
  23. Moffit JS, Boekelheide K, Sedivy JM, Klysis J (2007) Mice lacking Raf kinase inhibitor protein-1 (RKIP-1) have altered sperm capacitation and reduced reproduction rates with a normal response to testicular injury. *J Androl* 28: 883–890.
  24. Hahm JR, Ahn JS, Noh HS, Baek SM, Ha JH, et al. (2010) Comparative analysis of fat and muscle proteins in fenofibrate-fed type II diabetic OLETF rats: the fenofibrate-dependent expression of PEBP or C11orf59 protein. *BMB Rep* 43: 337–343.
  25. Serre L, Vallee B, Bureaud N, Schoentgen F, Zelwer C (1998) Crystal structure of the phosphatidylethanolamine-binding protein from bovine brain: a novel structural class of phospholipid-binding proteins. *Structure* 6: 1255–1265.
  26. Simister PC, Burton NM, Brady RL (2011) Phosphotyrosine recognition by the Raf kinase inhibition protein. *Forum Immunopath Dis Ther* 2: 59–70.
  27. Banfield MJ, Barker JJ, Perry AC, Brady RL (1998) Function from structure? The crystal structure of human phosphatidylethanolamine-binding protein suggests a role in membrane signal transduction. *Structure* 6: 1245–1254.
  28. Bucquoy S, Jolles P, Schoentgen F (1994) Relationships between molecular interactions (nucleotides, lipids and proteins) and structural features of the bovine brain 21-kDa protein. *Eur J Biochem* 225: 1203–1210.
  29. Atamanene C, Laux A, Glattard E, Muller A, Schoentgen F, et al. (2009) Characterization of human and bovine phosphatidylethanolamine-binding protein (PEBP/RKIP) interactions with morphine and morphine-glucuronides determined by noncovalent mass spectrometry. *Med Sci Monit* 15: 178–187.
  30. Granovsky AE, Clark MC, McElheny D, Heil G, Hong J, et al. (2009) Raf kinase inhibitory protein function is regulated via a flexible pocket and novel phosphorylation-dependent mechanism. *Mol Cell Biol* 29: 1306–1320.
  31. Shemon AN, Heil GL, Granovsky AE, Clark MC, McElheny D, et al. (2010) Characterization of the Raf kinase inhibitory protein (RKIP) binding pocket: NMR-based screening identifies small-molecule ligands. *PLoS One* 5: e10479.
  32. Shemon AN, Eves EM, Clark MC, Heil G, Granovsky A, et al. (2009) Raf kinase inhibitory protein protects cells against locostatin-mediated inhibition of migration. *PLoS One* 4: e6028.
  33. Dadvar P, Kovanich D, Folkers GE, Rumpel K, Rajmakers R, et al. (2009) Phosphatidylethanolamine-binding proteins, including RKIP, exhibit affinity for phosphodiesterase-5 inhibitors. *ChemBioChem* 10: 2654–2662.
  34. Park S, Rath O, Beach S, Xiang X, Kelly SM, et al. (2006) Regulation of RKIP binding to the N-region of the Raf-1 kinase. *FEBS Lett* 580: 6405–6412.
  35. Rath O, Park S, Tang HH, Banfield MJ, Brady RL, et al. (2008) The RKIP (Raf-1 Kinase Inhibitor Protein) conserved pocket binds to the phosphorylated N-region of Raf-1 and inhibits the Raf-1-mediated activated phosphorylation of MEK. *Cell Signal* 20: 935–941.
  36. Zuiderweg ERP (2002) Mapping protein-protein interactions in solution by NMR spectroscopy. *Biochemistry* 41: 1–7.
  37. Farmer BT, 2nd, Venters RA (1996) Assignment of aliphatic side-chain <sup>1</sup>H/<sup>15</sup>N resonances in perdeuterated proteins. *J Biomol NMR* 7: 59–71.
  38. Traut TW (1994) Physiological concentrations of purines and pyrimidines. *Mol Cell Biochem* 140: 1–22.
  39. Krosiak T, Koch T, Kahl E, Höllt V (2001) Human Phosphatidylethanolamine-binding Protein Facilitates Heterotrimeric G Protein-dependent Signaling. *J Biol Chem* 276: 39772–39778.
  40. Ribas C, Penela P, Murga C, Salcedo A, García-Hoz C, et al. (2007) The G protein-coupled receptor kinase (GRK) interactome: Role of GRKs in GPCR regulation and signaling. *Biochim Biophys Acta* 1768: 913–922.
  41. Marley J, Lu M, Bracken C (2001) A method for efficient isotopic labeling of recombinant proteins. *J Biomol NMR* 20: 71–75.
  42. Limbach PA, Crain PF, McCloskey JA (1995) Molecular mass measurement of intact ribonucleic acids via electrospray ionization quadrupole mass spectrometry. *J Am Soc Mass Spectrom* 6: 27–39.
  43. Jaquillard L, Saab F, Schoentgen F, Cadene M () Improved accuracy of low-affinity protein-ligand equilibrium dissociation constants determined by ESI-MS. *J Am Soc Mass Spec*, (in press).
  44. Yi C, Peng Y, Guo C, Lin D (2011) <sup>1</sup>H, <sup>13</sup>C, <sup>15</sup>N backbone and side-chain resonance assignments of the human Raf-1 kinase inhibitor protein. *Biomol NMR Assign* 5: 63–66.
  45. Salzmann M, Wider G, Pervushin K, Senn H, Wuthrich K (1999) TROSY-type triple-resonance experiments for sequential NMR assignments of large proteins. *J Am Chem Soc* 121: 844–848.
  46. Meyer B, Peters T (2003) NMR spectroscopy techniques for screening and identifying ligand binding to protein receptors. *Angew Chem Int Ed* 42: 864–890.
